# Supplementary figures and images for: Siwi levels reversibly regulate secondary piRISC biogenesis by affecting Ago3 body morphology in Bombyx mori
Source: PubMed Central journal article supplement — EMBO J. 2020 Sep 11;39(20):e105130. doi: 10.15252/embj.2020105130 (PMC7560202; doi:10.15252/embj.2020105130), 2020-09-11

Fig 1A

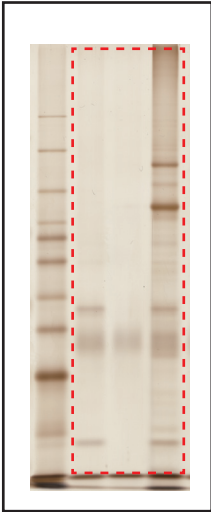

Fig 1B

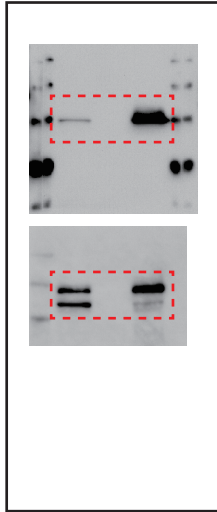

Fig 1C

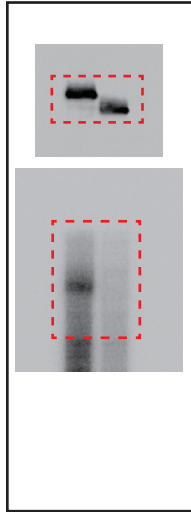

Fig 1D

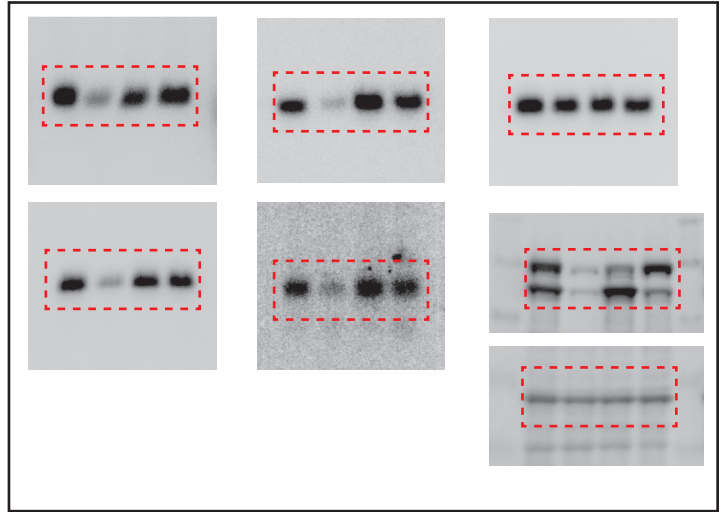

Fig 1E

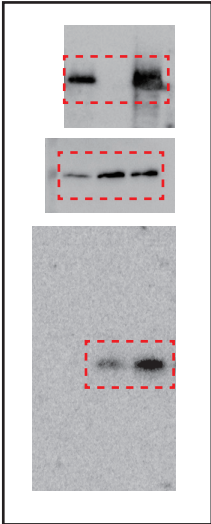

Fig 1F

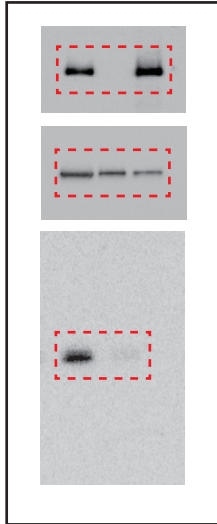

Fig 1H

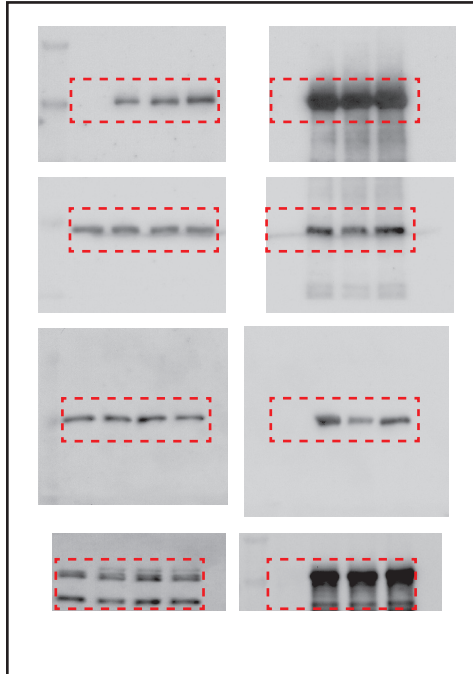

Supplement: EMBJ-39-e105130-s006.pdf [file EMBJ-39-e105130-s006.pdf]

Fig 3C

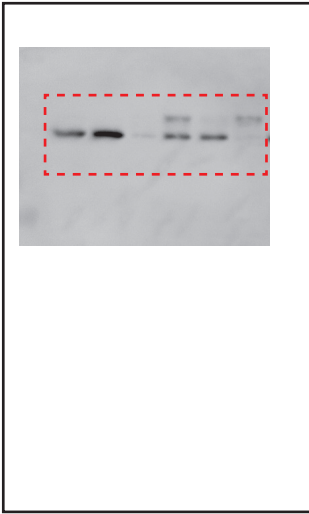

Fig 3D

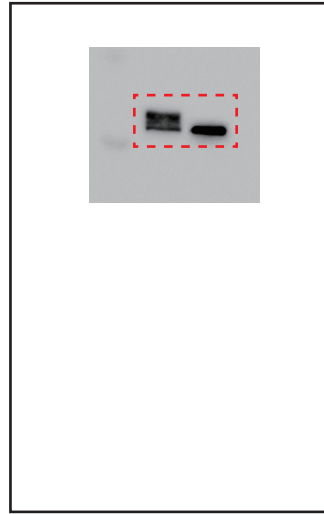

Fig 3E

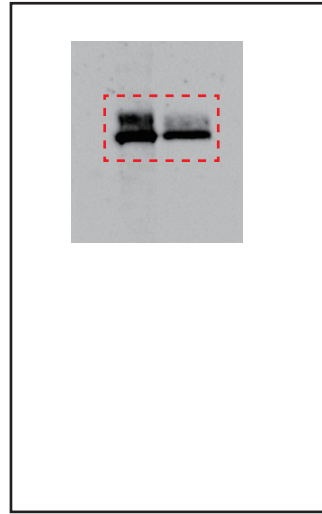

Fig 3F

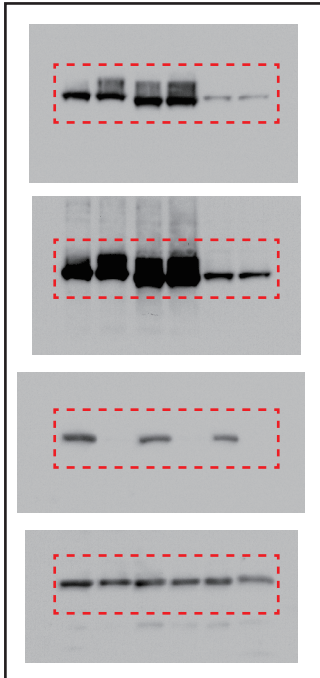

Fig 3G

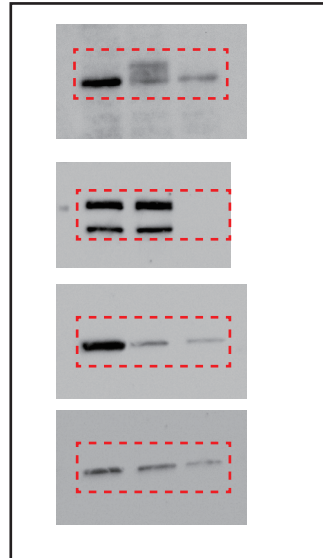

Supplement: EMBJ-39-e105130-s007.pdf [file EMBJ-39-e105130-s007.pdf]

Fig 4A

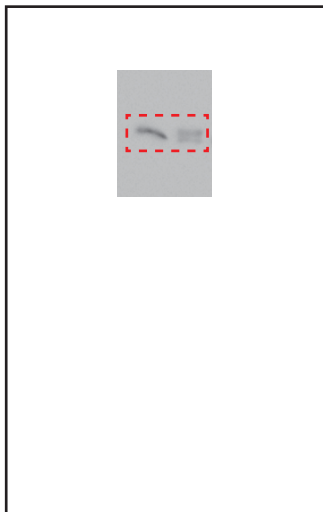

Fig 4D

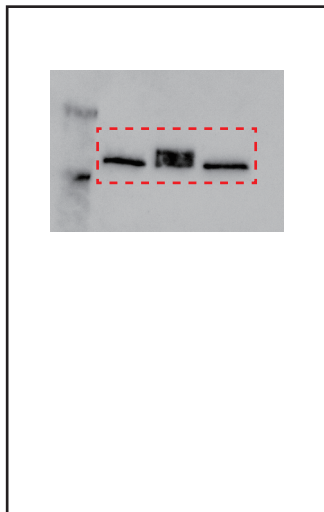

Fig 4E

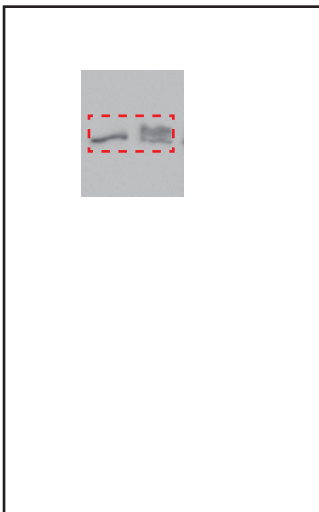

Supplement: EMBJ-39-e105130-s008.pdf [file EMBJ-39-e105130-s008.pdf]

Fig 5B

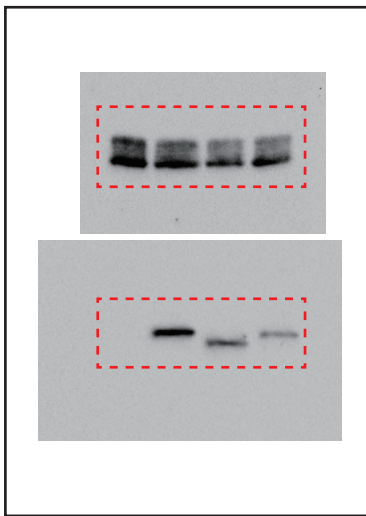

Supplement: EMBJ-39-e105130-s009.pdf [file EMBJ-39-e105130-s009.pdf]
